# Supplementary material
Source: PubMed Central journal article supplement (PMC3817827)

Donor

A

B

C

Peptide

Relative Fluorescence

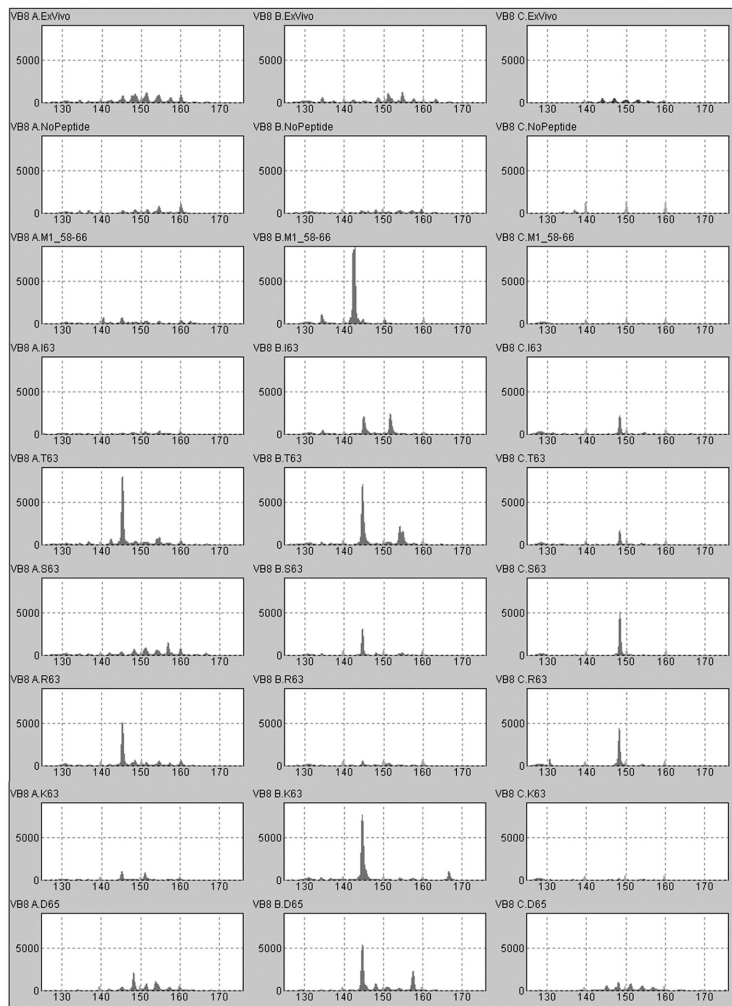

Ex Vivo

No Peptide

M1<sub>58-66</sub>

I63

T63

S63

R63

K63

D65

146

146

149

CDR3 length (bp)

Supplement: NIHMS510978-supplement-Supplementary_Figure_1.pdf [file NIHMS510978-supplement-Supplementary_Figure_1.pdf]
